# Supplementary material for: Recruitment Kinetics of XRCC1 and RNF8 Following MeV Proton and α-Particle Micro-Irradiation
Source: MDPI journal article supplement (doi:10.3390/biology12070921), 2023-06-27
Supplement: s1 [file s1]

# Recruitment Kinetics of XRCC1 and RNF8 Following MeV Proton and $\alpha$ -Particle Micro-Irradiation

Giovanna Muggiolu<sup>1</sup>, Eva Torfeh<sup>1</sup>, Marina Simon<sup>1</sup>, Guillaume Devès<sup>1</sup>, Hervé Seznec<sup>1</sup> and Philippe Barberet<sup>1</sup>

<sup>1</sup>University Bordeaux, CNRS, LP2I, UMR 5797, 33170 Gradignan, France

## Supplementary Data

**Table S1.** GFP-XRCC1 kinetics after proton and  $\alpha$ -particle micro-irradiations. The variations of T<sub>2</sub> parameter allowed to separate the cells behavior in two main groups: in the first one <sup>(a)</sup> the fluorescence intensity decreases after reaching the maximum value; in the second one <sup>(b)</sup> the fluorescence intensity does not decrease. The recruitment time is not influenced by these variations.

| Ion            | Ions per Point/<br>Nucleus | Dose (Gy) | Number of Cells Analyzed | Intensity of Fluorescence $\pm$ SD | Mean Recruitment Time (s) $\pm$ SD | Mean Decay Time (s) $\pm$ SD         |
|----------------|----------------------------|-----------|--------------------------|------------------------------------|------------------------------------|--------------------------------------|
| 3 MeV $\alpha$ | 10                         | 1         | 8                        | 0.4 $\pm$ 0.3                      | 117 $\pm$ 93                       | 3102 $\pm$ 179 <sup>(a)</sup>        |
| 3 MeV $\alpha$ | 10                         | 1         | 8                        | 0.3 $\pm$ 0.01                     | 307 $\pm$ 187                      | 1.0E+05 $\pm$ 9.7E+04 <sup>(b)</sup> |
| 3 MeV $\alpha$ | 50                         | 5         | 36                       | 1.5 $\pm$ 0.4                      | 259 $\pm$ 127                      | 3678 $\pm$ 1819                      |
| 3 MeV $\alpha$ | 100                        | 10        | 29                       | 1.5 $\pm$ 0.7                      | 160 $\pm$ 29                       | 4200 $\pm$ 2507                      |
| 3 MeV $\alpha$ | 1000                       | 100       | 34                       | 3.8 $\pm$ 1.4                      | 34 $\pm$ 14                        | 5343 $\pm$ 2155                      |
| 3 MeV H+       | 100                        | 1         | 28                       | 0.4 $\pm$ 0.2                      | 233 $\pm$ 83                       | 5336 $\pm$ 7639 <sup>(a)</sup>       |
| 3 MeV H+       | 100                        | 1         | 18                       | 0.5 $\pm$ 0.3                      | 315 $\pm$ 113                      | 1.7E+05 $\pm$ 5.2E+05 <sup>(b)</sup> |
| 3 MeV H+       | 500                        | 5         | 28                       | 1.9 $\pm$ 1.1                      | 221 $\pm$ 142                      | 1697 $\pm$ 2300 <sup>(a)</sup>       |
| 3 MeV H+       | 500                        | 5         | 10                       | 1.2 $\pm$ 0.5                      | 210 $\pm$ 51                       | 2.0E+05 $\pm$ 2.9E+05 <sup>(b)</sup> |
| 3 MeV H+       | 1000                       | 10        | 25                       | 2.4 $\pm$ 0.7                      | 138 $\pm$ 44                       | 11120 $\pm$ 28607                    |

**Table S2.** GFP-RNF8 kinetics after proton and  $\alpha$ -particle irradiations.

| Ion            | Ions per Point/Nucleus | Dose (Gy) | Number of Cells Analyzed | Mean Recruitment Time (s) $\pm$ SD |
|----------------|------------------------|-----------|--------------------------|------------------------------------|
| 3 MeV $\alpha$ | 1                      | 0.1       | 28                       | 452 $\pm$ 210                      |
| 3 MeV $\alpha$ | 10                     | 1         | 27                       | 524 $\pm$ 254                      |
| 3 MeV $\alpha$ | 100                    | 10        | 26                       | 223 $\pm$ 105                      |
| 3 MeV H+       | 100                    | 1         | 31                       | 755 $\pm$ 445                      |
| 3 MeV H+       | 1000                   | 10        | 16                       | 937 $\pm$ 425                      |
